# Supplementary material for: Long-term trastuzumab (Herceptin®) treatment in a continuation study of patients with HER2-positive breast cancer or HER2-positive gastric cancer
Source: PubMed Central journal article supplement (PMC5856394; doi:10.1186/s12885-018-4183-2), 2018-03-15
Supplement: 12885_2018_4183_MOESM1_ESM.pdf [file 12885_2018_4183_MOESM1_ESM.pdf]

## Ethics approvals

The ROP study received ethics approvals from the institutions listed in Table S1.

**Table S1: Institutions providing ethics approval for the ROP study**

| Lead investigator         | Institution                                                                                                                                                                                      |
|---------------------------|--------------------------------------------------------------------------------------------------------------------------------------------------------------------------------------------------|
| Sergei Tjulandin          | E.C. of FSBI Russian Oncology Research Center named after N.N. Blokhin of RAMS, Kashirskoye Shosse, 24, 115478, Moscow, Russian Federation                                                       |
| Vladimir Moiseyenko       | E.C. of Research Oncology Institute named after N.N. Petrov of Ministry of Health and Social Development, Poselok Pesochny, Leningradskaya ulitsa 68, 189646, St. Petersburg, Russian Federation |
| Juan Carlos Alcedo        | Comité Nacional de Bioética Inst. Conmemorativo Gorgas, Avenida Justo Arosamena y Calle 35, Inst. Conmemorativo Gorgas de Estudio de la Salud, 0816-02593, Panama                                |
| Ingo Bauerfeind           | Ethikkommission der Medizinischen Fakultät, der Ludwig-Maximilians-Universität München, Pettenkoferstr. 8a, 80336, Munich, Germany                                                               |
| Volkmar Müller            | EK Hamburg ÄK, Weidestr. 122 b, 22083, Hamburg, Germany                                                                                                                                          |
| Michael Clemens           | EK Rheinland-Pfalz LÄK, Deutschhausplatz 3, 55116, Mainz, Germany                                                                                                                                |
| Jacek Jassem              | Niezależna KB d/s Badan Naukowych przy AM w Gdańsk, ul. M. Skłodowskiej-Curie 3a, 80-210, Gdańsk, Poland                                                                                         |
| Sergei Primushko          | E.C. of Republic Clinical Oncological Hospital, 102, Lenin str., 426009, Izhevsk, Russian Federation                                                                                             |
| Bella Kaufman             | Helsinki Committee – Sheba Tel Hashomer, Sheba M.C., Ramat-Gan, Israel                                                                                                                           |
| Datong Chu                | Local E.C. of Chinese Academy of Medical Science; Cancer Inst. & Hospital, Number 17, Panjiayuan South Road, 100021, Beijing, China                                                              |
| Yung-Jue Bang             | Seoul National University Hospital Institutional Review Board, 101, Daehak-ro, Jongno-gu, 110-744, Seoul, Republic of Korea                                                                      |
| Min Hee Ryu               | Asan Medical Center Ethics Committee, 88, Olympic-ro 43-gil, Songpa-gu, 138-736, Seoul, Republic of Korea                                                                                        |
| Hyun Cheol Chung          | Yonsei University Severance Hospital Institutional Review Board, Yonsei-ro 50, Seodaemun-Gu, 120-752, Seoul, Republic of Korea                                                                   |
| Dominique Genre           | CPP Sud-Méditerranée I, Institut Paoli Calmettes, 232 Boulevard Sainte Marguerite BP156, 13273, Marseille, France                                                                                |
| Keunwook Lee              | Seoul National University Bundang Hospital Institutional Review Board, 82, Gumi-ro 173 Beon-Gil, Bundang-Gu, 463-707, Seongnam-Si, Gyeonggi-Do, Republic of Korea                                |
| Lin Shen                  | The Ethics Committee of Beijing Cancer Hospital, No.52 Fucheng Road, Haidian District, 100036, Beijing, China                                                                                    |
| Luis Miguel Zetina Toache | Comité de Ética Independiente Zugueme, 3a Calle 11-36, Zona 15, 01015, Guatemala                                                                                                                 |

|                               |                                                                                                                                                    |
|-------------------------------|----------------------------------------------------------------------------------------------------------------------------------------------------|
| Guenther Bastert              | EK Heidelberg, Alte Glockengießerei 11/1, 69115, Heidelberg, Germany                                                                               |
| Michael Untch                 | Ethikkommission der Medizinischen Fakultät, der Ludwig-Maximilians-Universität München, Pettenkoferstr. 8a, 80336, Munich, Germany                 |
| Gerhard Schaller              | Ethikkommission Charité – Universitätsmedizin Berlin, Chariteplatz 1, 10117, Berlin, Germany                                                       |
| Thomas Kraus                  | EK der Medizinischen Fakultät der Georg-August-Universität Göttingen, Robert-Koch-Str. 40, 37075, Göttingen, Germany                               |
| Klaus Diedrich                | EK Lübeck, Ratzeburger Allee 160, 23538, Lübeck, Germany                                                                                           |
| Wolfgang Eiermann             | EK Bayern LAK, Muhlbaurstr. 16, 81677, Munich, Germany                                                                                             |
| Rick Abraham                  | Royal Brisbane & Women's Hosp Health Svc-Human Research, Level 7, Block 7 Butterfield Street, 4029, Herston, Queensland, Australia                 |
| John Stewart                  | Hunter New England Health HREC, Hunter New England Area Health Headquarters, Lookout Road, 2305, New Lambton, New South Wales, Australia           |
| Vernon Harvey                 | Northern X Ethics Committee, 3 <sup>rd</sup> Floor, Unisys Building, 650 Great South Rd, Penrose, 1061, Auckland, New Zealand                      |
| Josep Manel Baselga Torres    | Comité Ético de Investigación Clínica, Hospital General Universitari Vall d'Hebron, Fundació Recerca Biomèdica i Docència, 08035, Barcelona, Spain |
| Jacques De Greve              | EC UZ Brussel, Laarbeeklaan, 101, 1090, Brussels, Belgium                                                                                          |
| Richard Bell                  | Barwon Health Research & Ethics Advisory Committee, The Geelong Hospital, Ryrie Street, 3220, Geelong, Victoria, Australia                         |
| David Grimes                  | Uniting HealthCare Human Research Ethics Committee, PO Box 499, 4066, Toowong, Queensland, Australia                                               |
| Raymond Snyder                | St Vincent Human Research Ethics Committee, 41 Victoria Rd, 3065, Fitzroy, Victoria, Australia                                                     |
| David Miles                   | Scotland A Research Ethics Committee; Secretariat, Waverley Gate, 2–4 Waterloo Place, Edinburgh, EH1 3EG, United Kingdom                           |
| António Moreira               | CEIC – Comissão de Ética para Investigação Clínica, Parque da Saúde de Lisboa, Av. do Brasil, 53-Pav. 17-A 1749-004, Lisbon, Portugal              |
| M. Jose Picon Cesar           | CEIC Hospital General Universitario Alicante, Maestro Alonso 109, 03010, Alicante, Spain                                                           |
| Stephen Chan                  | Scotland A Research Ethics Committee; Secretariat, Waverly Gate, 2–4 Waterloo Place, Edinburgh, EH1 3EG, United Kingdom                            |
| Istvan Lang                   | Orszagoz Onkologiai Intezet Klinikai Onkol. Kozpont, Rath Gyorgy u. 7-9, H-1122, Budapest, Hungary                                                 |
| Janos Szanto                  | Medical Research Council, Ethics Committee for Clinical Pharmacology, Arany J. u. 6-8., 1051, Budapest, Hungary                                    |
| Zoran Neskovic-Konstantinovic | Ethics Committee of Institute of Oncol. & Radiology, Pasterova 14, 11000, Belgrade, Serbia                                                         |
